# Supplementary material for: Systematic Review and Meta-study Synthesis of Qualitative Studies Evaluating Facilitators and Barriers to Participation in Colorectal Cancer Screening
Source: Oxford University Press journal article supplement (doi:10.1158/1055-9965.epi-15-0990), 2016-04-14
Supplement: 10559965epi150990-sup-155078_1_supp_3388761_p4500q.docx [file 10559965epi150990-sup-155078_1_supp_3388761_p4500q.docx]

**Supplementary Table S1** Search strategy used for current systematic review and meta study synthesis in Medline, from inception to February 2015.

1 exp Colorectal Neoplasms/

2 exp Colonic Neoplasms/

3 exp Rectal Neoplasms/

4 (anal adj cancer$).mp.

5 (anal adj carcinoma$).mp.

6 (anal adj adeno?carcinoma$).mp.

7 (anal adj neoplasm$).mp.

8 (anal adj tumo?r$).mp.

9 (anal adj lesion$).mp.

10 (anal adj adenom$).mp.

11 (anal adj sarcom$).mp.

12 (anal adj malignan$).mp.

13 (anus adj cancer$).mp.

14 (anus adj carcinoma$).mp.

15 (anus adj adeno?carcinoma$).mp.

16 (anus adj neoplasm$).mp.

17 (anus adj tumo?r$).mp.

18 (anus adj lesion$).mp.

19 (anus adj adenom$).mp.

20 (anus adj sarcom$).mp.

21 (anus adj malignan$).mp.

22 (bowel adj cancer$).mp.

23 (bowel adj carcinoma$).mp.

24 (bowel adj adeno?carcinoma$).mp.

25 (bowel adj neoplasm$).mp.

26 (bowel adj tumo?r$).mp.

27 (bowel adj lesion$).mp.

28 (bowel adj adenom$).mp.

29 (bowel adj sarcom$).mp.

30 (bowel adj malignan$).mp.

31 (colorectal adj cancer$).mp.

32 (colorectal adj carcinoma$).mp.

33 (colorectal adj adeno?carcinoma$).mp.

34 (colorectal adj neoplasm$).mp.

35 (colorectal adj tumo?r$).mp.

36 (colorectal adj lesion$).mp.

37 (colorectal adj adenom$).mp.

38 (colorectal adj sarcom$).mp.

39 (colorectal adj malignan$).mp.

40 (colon$ adj cancer$).mp.

41 (colon$ adj carcinoma$).mp.

42 (colon$ adj adeno?carcinoma$).mp.

43 (colon adj neoplasm$).mp.

44 (colon$ adj tumo?r$).mp.

45 (colon$ adj lesion$).mp.

46 (colon$ adj adenom$).mp.

47 (colon$ adj sarcom$).mp.

48 (colon$ adj malignan$).mp.

49 (rectal adj carcinoma$).mp.

50 (rectal adj cancer$).mp.

51 (rectal adj adeno?carcinoma$).mp.

52 (rectal adj neoplasm$).mp.

53 (rectal adj tumo?r$).mp.

54 (rectal adj lesion$).mp.

55 (rectal adj adenom$).mp.

56 (rectal adj sarcom$).mp.

57 (rectal adj malignan$).mp.

58 (rectum adj carcinoma$).mp.

59 (rectum adj cancer$).mp.

60 (rectum adj adeno?carcinoma$).mp.

61 (rectum adj neoplasm$).mp.

62 (rectum adj tumo?r$).mp.

63 (rectum adj lesion$).mp.

64 (rectum adj adenom$).mp.

65 (rectum adj sarcom$).mp.

66 (rectum adj malignan$).mp.

67 (sigmoid adj cancer$).mp.

68 (sigmoid adj adeno?carcinoma$).mp.

69 (sigmoid adj neoplasm$).mp.

70 (sigmoid adj tumo?r$).mp.

71 (sigmoid adj lesion$).mp.

72 (sigmoid adj adenom$).mp.

73 (sigmoid adj sarcom$).mp.

74 (sigmoid adj malignan$).mp.

75 or/1-74

76 Early Detection of Cancer/

77 exp Occult Blood/

78 exp Immunochemistry/

79 exp Endoscopy, Gastrointestinal/

80 exp Colonoscopy/

81 exp Sigmoidoscopy/

82 Colonography, Computed Tomographic/

83 (disease adj2 detect$).tw.

84 endoscop$.mp.

85 colonograph$.mp.

86 colonoscop$.mp.

87 sigmoidoscop$.mp.

88 rectosigmoidoscop$.mp.

89 proctosigmoidoscop$.mp.

90 COL.mp.

91 SIG.mp.

92 FSIG.mp.

93 (flex$ adj3 sig$).mp.

94 faecal.mp.

95 fecal.mp.

96 feces.mp.

97 faeces.mp.

98 gFOBT.mp.

99 FOBT.mp.

100 FOB.mp.

101 haemoccult.mp.

102 hemoccult.mp.

103 sensa.mp.

104 hemocare.mp.

105 (hema adj screen).mp.

106 hemofec.mp.

107 fecatest.mp.

108 fecatwin.mp.

109 coloscreen.mp.

110 seracult.mp.

111 colocare.mp.

112 flexsure.mp.

113 immocare.mp.

114 hemochaser.mp.

115 hemeselect.mp.

116 immudia.mp.

117 monohaem.mp.

118 insure.mp.

119 hemodia.mp.

120 immocare.mp.

121 magstream.mp.

122 guaiac.mp.

123 (occult adj blood).mp.

124 (stool adj3 occult).mp.

125 (immunochemical$ adj3 test$).mp.

126 (immunochemical$ adj3 screen$).mp.

127 (immunochemical$ adj3 diagn$).mp.

128 (immunologic$ adj3 test$).mp.

129 (immunologic$ adj3 screen$).mp.

130 (immunologic$ adj3 diagn$).mp.

131 EIA.mp.

132 RPHA.mp.

133 exp Mass Screening/

134 exp Population Surveillance/

135 surveillance.mp.

136 (early adj3 detect$).mp.

137 (early adj3 prevent$).mp.

138 screen$.mp.

139 or/76-138

140 interview$.mp. [ qualitative search filter - validated ]

141 experience$.mp.

142 qualitative.tw.

143 or/140-142

144 75 and 139 and 143

145 exp Animals/ not (exp Animals/ and Humans/)

146 144 not 145

**Supplementary Table S2.** Descriptive characteristics of included studies and main findings, by qualitative design and quality.

| Lead author  Year  Country | | Study Design | | | | | | | | Main Findings (Italicized text represents quotes or utterances) |
| --- | --- | --- | --- | --- | --- | --- | --- | --- | --- | --- |
| Sample/ Age (years) | Ethnicity | SES | | Theoretical framework | | Analytical method | | K: Knowledge; P: Perception; C/B: cue/barrier to action;  HCS: Health care system; G: Gender; SES: Socioeconomic;  C: Cultural |
| Focus Groups | | | | | | | | | | |
| *Quality: Meeting ≥ 8/10 CASP criteria* | | | | | | | | | | |
| Beeker  2000  USA([1](#_ENREF_1)) | | 14 focus groups  (10-11/ group)  Range: >50 | White- American/ African American (AA) | N/R | | PPM | | Organizing data based on predefined categories | | K: *Overall, they were poorly informed about colorectal cancer and the possible benefits of screening, reporting little or no information from physicians or mass media.*  P: *Negative attitudes toward screening procedures, and fear of cancer.*  C/B: *Despite references to the subject matter as embarrassing or private, both men and women, African Americans and whites, appeared to talk candidly and comfortably in the permissive context of the focus group.* |
| Weitzman 2001  USA([2](#_ENREF_2)) | | Females (F): 22  Males (M): 17  Range: >50 | White-American  (one younger AA male was also included) | N/R | | HBM, Social Cognitive Theory | | Content analysis and organizing data based on predefined categories,  Narrative analysis | | K: *CRC-related knowledge is low, and misperceptions are common.*  HCS: *Provider practices reinforce low levels of perceived risk.*  *Multiple barriers to screening exist, of which many are remediable.* |
| Holmes-Rovner  2002  USA([3](#_ENREF_3)) | | All:21  AA range: 55-86. White: range: 60-64 | White-American/AA | Mixed | | N/R | | Thematic analysis | | K: *White women were better informed about screening purposes and procedures.*  P: *All participants believed in the efficacy of cancer screening.*  C/B: *Potential for pain from screening or treatment of CRC, should it be discovered.*  HCS: *The major barriers to screening were quality of care (ie. the perceived lack of offering screening and the follow-up of test results).* |
| O'Malley 2002  USA([4](#_ENREF_4)) | | F: 34  M: 36  Range:  20-80 | Latin American | Low | | N/R | | Content analysis | | K: *Lack of knowledge about cancer screening particularly colorectal cancer screening.*  C/B: Fatalism and embarrassment.  HCS: Non-concordant physician gender and resource constraints of *primary care serving the uninsured*.  SES: Perceived costs of screening tests. |
| Goel  2004  Canada([5](#_ENREF_5)) | | F: 22  M: 19    Mean: 61 | N/R | N/R | | N/R | | Thematic analysis | | K: *Low levels of knowledge about colorectal cancer and its prevention in the general population.*  C/B: *FOBT was an acceptable screening modality. Colonoscopy was not perceived to be a good choice for a primary screen in the general population.* |
| O'Sullivan 2004  United Kingdom([6](#_ENREF_6)) | | F: 11  M: 25  Range:  35-70 | White (UK) | N/R | | HBM | | Thematic analysis | | K: *Colorectal cancer viewed as having severe quality of life impacts.* Regarded as being caused by diet.  C/B: *Having to complete the FOBT oneself may also be viewed as giving an individual more personal control over the procedure*;  *The psychological impact of actually handling faecal matter; completing a screening test raises anxiety and fear amongst those invited to participate.* *Fear of an abnormal test outcome was viewed by participants as a potential barrier to compliance.* |
| Royak-Schaler  2004  USA([7](#_ENREF_7)) | | F: 42  Range:  40-60 | AA, Hispanic American | Low | | Approaches to Risk Communication | | Code-based analysis | | C/B: *Strong participant interest in strategies necessary to understand and reduce the risk of developing breast and colorectal cancers. Preferred risk communication tools presented information about family history and personal risk in graphic and quantitative formats.* |
| Dube  2005  USA([8](#_ENREF_8)) | | All: 53  Range: 18-75 | Non-Hispanic White-American, Hispanic, AA,  Asian-American | Mixed | | N/R | | Code-based analysis | | HCS: *Lack of explanations during physical exams resulted in negative experiences. Men were eager to learn more about their health, but commonly complained that they received neither appropriate cancer screening nor sufficient explanations from their physicians.*  *These men desired more discussion and better sources of health information during medical encounters.*  G: *Men in this study prefer physicians who establish interpersonal relationships with male patients.* |
| Greiner  2005  USA([9](#_ENREF_9)) | | All: 55  Mean: 56 | AA | Low | | HBM | | Thematic analysis | | K: *Knowledge—lack of CRC knowledge and a desire for more information* P: *Hope—a positive attitude toward screening.*  HCS: *Mistrust—distrust that the system or providers put patients first.*  C/B: *Fear—fear of cancer, the system, and of CRC screening procedures*  *Fatalism—the belief that screening and treatment may be futile and surgery causes spread of cancer,*  *Accuracy—a preference for the most thorough and accurate test for CRC* |
| Coronado 2006  USA([10](#_ENREF_10)) | | All:43  > 50 | Hispanic-American | Low | | N/R | | Principles of qualitative research suggested by Morgan and Krueger([11](#_ENREF_11)) | | K: *Few focus group participants had ever heard of colorectal cancer or specific screening exams to detect early forms of cancer.*  P: *Respondents commonly expressed fatalistic attitudes about their chances of recovering from cancer, some preferred not to know if they had cancer or believed that they would refuse treatment if diagnosed with cancer.*  C/B: *Participants identified cost of medical care and embarrassment about receiving colorectal exams as barriers to screening participation.*  *Nevertheless, many participants noted that strong support from family and friends or a strong will would allow one to survive cancer.* |
| Goodman  2006  USA([12](#_ENREF_12)) | | All: 70  F: 43  M: 27  Mean: 60  Range:  50-80 | South American (Peru, Bolivia, Colombia),Central America (El Salvador, Honduras  (US) | Low | | N/R | | Content analysis | | K: *Lack of understanding of the screening procedures, inadequate knowledge about CRC.*  HCS: *Inadequate number of Spanish speaking providers, lack of funding and resources. Physician recommendation.*  SES: *Cost of screening* |
| Greisinger 2006  USA([13](#_ENREF_13)) | | In FG1:  F: 17  M: 2  Median:  58Range:  50-81  In FG2:  F: 13  M: 10  Median  59  Range:  51-65 | White-American,  AA,  Asian,  Hispanic | N/R | | N/R | | Thematic analysis | | K: *Low knowledge about CRC. Some participants initially failed to recognize the difference between sigmoidoscopy (SIG) and colonoscopy (COL).*  C/B: *Fear and embarrassment about CRC and CRCS. Attitudes towards the fecal occult blood test (FOBT) were mixed, with some participants considering it difficult to finish and others preferring the privacy it afforded. Several endoscopy-specific barriers were identified such as dislike or fear of test preparation. Some participants felt that endoscopy was likely to be more effective than FOBT, and others clearly preferred COL to SIG.*  HCS: *System-specific barriers to endoscopy (e.g. difficulty scheduling appointments and insurance coverage) were also identified.* |
| Fernandez  2008  USA([14](#_ENREF_14)) | | All: 88  F: 55  M: 33  Range:  ≥40 | Hispanic American | Low | | PRECEDE | | Thematic analysis | | K: *Lack of patient knowledge about CRC and screening appeared to be a critical factor influencing screening.*  P: *Themes about death and pain due to cancer were prevalent.*  C/B: *Machismo and embarrassment*.  HCS: *Frustration and a lack of confidence in the U.S. healthcare system.*  *Few participants had been advised by their providers to obtain CRC screening.*  Medical insurance.  SES: Transportation impacted screening.. |
| Friedemann-Sanchez  2007  USA([15](#_ENREF_15)) | | All: 70  Range: 50-78 | AA,  White-American,  Hispanic, Asian | Low | | N/R | | Grounded and  interpretive text analysis | | G: *Women viewed the preparation for endoscopic procedures as a major barrier to screening while men did not; women and men expressed different fears and information preferences regarding endoscopic procedures; and women perceive CRC as a male disease thus feeling less vulnerable to CRC.*  *Gender-specific barriers may explain women’s lower rate of screening for CRC.* |
| Goldsmith 2008  USA([16](#_ENREF_16)) | | All: 15  Mean: 56 | AA,  Caucasian-American, Latinos | N/R | | N/R | | Thematic analysis | | K: Lack of information.  P: Fear.  HCS: *Failure of the physician to strongly recommend CRC screening.* |
| Baron-Epel  2009  Israel([17](#_ENREF_17)) | | F: 41  M: 41  Range  > 50 | Jewish Israelis | N/R | | Learning hierarchies | | Thematic analysis | | K: *Medical knowledge expressed in the focus groups was high. Cancer was regarded as many distinct diseases, each one with different chances of early detection and cure.*  P: CRC was regarded as fatal. *Participants expressed great fear of cancer, particularly fear of treatments and death. Genetics was expressed as having a fatalistic role and as prompting early detection.* |
| Feeley  2009  USA([18](#_ENREF_18)) | | All: 103  F: 54  M:49  Range: 50-80 | White-American | Mixed | | N/R | | Content analysis and constant comparative analysis | | HCS: *Physician recommendation and knowing someone who has/had cancer were the most common factors motivating patients' decision to complete CRC screening. Results are framed according to patient and clinician perceptions of self-efficacy related to CRC screening.* |
| Francois  2009  USA([19](#_ENREF_19)) | | F: 27  M: 18  Median  F:49 / M:55 | Haitian | Low | | N/R | | Thematic analysis | | P: *Many expressed that they simply do not want to know whether there is something wrong with them*;  *going to a doctor only when there is an obvious reason to do so.*  HCS: *Without insurance it may not be possible to get quality care*;  concordant physician gender,  *English language was a significant barrier to health care access*. *Participants had not undergone screening because their doctors never talked to them about it.*  SES: *The majority of the participants did not know where, or what, the colon was.*  C: *There was the belief among some that home remedies such as ‘‘ti bonm’’ (peppermint leaves) can cure anything* |
| Holt  2009  USA([20](#_ENREF_20)) | | All: 165  Mean:  63 | White-American,  AA | Mixed | | Standard focus group discussion guide consistent with the HBM | | Miles and Huberman’s process,([21](#_ENREF_21)) close-textual analysis | | K: *Knowledge among participants was limited regarding age to begin screening, insurance coverage and risk factors for CRC.*  P: *Perceived barriers to screening included lack of physician recommendations cost/lack of insurance coverage, pain/discomfort and embarrassment.*  C: *African-American men reported postponement in seeing their physicians. White women were proactive at initiating discussion of CRC screening with their providers while African-American women felt that providers should drive the process.* |
| Oscar  2009  USA([22](#_ENREF_22)) | | All: 37  Mean: 69.2 | AA | Middle | | HBM, Trans-theoretical model, and resilience theory | | Grounded theory, constant comparative method | | K: Lack of knowledge.  P: Fear, lack of symptoms.  C/B: Embarrassment. peace of mind, *open communication with family/friends, and presence of symptoms*  HCS: *Screening as part of comprehensive care, doctor’s recommendation*.  SES: Lack of money/insurance.  C: Homeopathic remedies |
| Ruffin  2009  USA([23](#_ENREF_23)) | | All: 93  Mean: 60 | AA, Caucasian Americans | Mixed | | N/R | | Thematic analysis | | *K: Participants had modest knowledge about CRC and there were fewer correct answers to knowledge questions by African Americans.*  *P: Participants recognized value of early detection, and identified health symptoms.*  *C/B: They chose colonoscopy and FOBT as the most preferred tests, while barium enema was least preferred.*  *HCS: Doctor’s recommendation as influential for obtaining CRC screening.* |
| Bass  2011  USA([24](#_ENREF_24)) | | All: 23  F: 15  M: 8  Range:  50-64 | AA | N/R | | N/R | | N/R | | K: *A general lack of knowledge about CRC and screening modalities.*  C/B: *All groups were also found to have a negative attitude about the use of fecal occult blood testing and felt colonoscopy was the superior screening modality.*  G: *Women had an overall sense that health screenings were needed and indicated a stronger need to have a positive relationship with their doctor.* *Women also reported that African American men do not get colonoscopy because of the perceived sexual connotation. Men who had never been screened, compared to those who had been screened, had less trust of their doctors and the health care system and indicated an overall fear of going to the doctor. They also reiterated the sexual connotation of having a colonoscopy and were apprehensive about being sedated during the procedure.* |
| Diaz  2011  USA([25](#_ENREF_25)) | | All: 37  F: 19  M: 18  Mean  F:58.7  M:56.3 | Spanish-speaking Latinos  (US) | Low | | HBM, the PAPM, the Preventive health model | | Immersion/  crystallization | | K: *Participants frequently referred to the role of diet in keeping the colon "clean," suggesting that retained feces increase CRC risk.*  P: *General cancer risks, risks related to nutrition and the digestive tract, and risks related to sexual practices.*  G: *Among both men and women, rectal sex was commonly associated with increased CRC risk* |
| Molina-Barcelo  2011  Spain([26](#_ENREF_26)) | | All: 56  Range  50-69 | Spanish (Spain) | Mixed | | HBM and Social Determinants of Health | | Discursive analysis | | K: *Non-participants and those with lower SES tended to have less knowledge about both the disease and the programme.*  G: *Women were motivated because they value the importance of self-care and early detection in order to prevent personal and family suffering while men were encouraged by their partners.*  *Women feared the results and considered the test unpleasant whereas men showed carelessness and lack of concern.*  SES: *In population-based programmes people with lower SES and men are those with the most obstacles to participation due to low health literacy and traditional gender roles respectively.* |
| Garcia-Dominic  2012  USA([27](#_ENREF_27)) | | All: 82  F: 42  M: 40  Range  26-77 | Latino  (US) | Low | | HBM | | Content analysis | | P: *Fear of having/getting cancer*;  *Inability to accept bad news;*  and lack of spousal support, fatalism, *fear of no cancer cure*.  HCS*: Lack of medical teams visiting the community, scheduling challenges, lack of CRC education, incorrect CRC information, cost, lack of health insurance to pay doctor/treatment or co-pay, and lack of payment instalment options for screening or treatment services*  *Wait time,*  *Not trusting the doctor or medical system*  *The exclusion of family members at the doctor’s visit and health education opportunities as barriers.*  G: Male machismo  SES: *Language barriers due to limited English proficiency*, lack of transportation, lack of nearby clinic, limited income, time constraints. |
| Jilcott Pitts  2013  USA([28](#_ENREF_28)) | | All: 45  Median  50 | AA,  White-American non-Hispanic,  American Indian/Alaskan native, Other | Low | | HBM | | Thematic analysis | | C/B: *Support from family and friends, and the desire to live a long and healthy life.*  Fear of the test itself (colonoscopy), fear of cancer diagnosis, and fear of burdening family members.  HCS: Doctor’s recommendation.  G: *Violation (among men) and embarrassment (among women).*  SES: *High cost of tests and follow-up care.* |
| Palmer  2014  UK([29](#_ENREF_29)) | | All: 128  F: 61  M: 67  Range  60-74 | White-English,  South-Asian,  African-Caribbean,  West-African  (UK) | Mixed | | N/R | | Grounded Theory | | K: *Feeling well was associated with low perceived relevance of screening.*  P: *Not knowing screening results was reported to be preferable to the implications of a positive screening result.*  C/B: *Participants described sampling faeces and storing faecal samples as broaching a cultural taboo, and causing shame.*  *Completion of the test kit within the home rather than a formal health setting was considered unsettling and reduced perceived importance.*  *Talking about bowel cancer screening with family and peers emerged as the key to subsequent participation in screening*. |
| Ekberg  2014  UK([30](#_ENREF_30)) | | All: 33  F: 18  M: 15  Range  60-69 | British | Mixed | | N/R | | Thematic analysis | | K: *Lack of disease symptoms.*  HCS: *Prior experience with health systems.*  P: *Association of screening with entry into old age*.  *Individual perceptions of risk (and benefit);* *fear of becoming a cancer patient after the screening test.*  C/B: *Embarrassment associated with completing the test and messages that adopt a paternalistic ethos;*  *Support of a significant other.* |
| *Quality: Meeting 4-7/10 CASP Criteria* | | | | | | | | | | |
| Katz  2004  USA([31](#_ENREF_31)) | | All: 45  Mean: 63  Range  ≥ 50 | AA | N/R | | N/R | | Factor analysis, analysis of variance, and logistic regression | | HCS: *Quality of the participants' communication with their health care provider.* |
| Fyffe  2008  USA([32](#_ENREF_32)) | | M: 24  Range:  22-85 | AA | Low | | HBM | | Immersion/ crystallization | | P: *Fear associated with screening*.  HCS: *Patient–doctor relationships, insurance and mistrust of healthcare professionals.* |
| Woodrow 2008  UK([33](#_ENREF_33)) | | All:86  Range: 60–69 | White British, Asian, European | N/R | | N/R | | Thematic analysis | | K: Whilst some believed it was appropriate for information regarding the *potentially negative aspects of the programme to be communicated at the outset, others expressed concerns about the generation of anxiety and potential for decreased participation. A number of participants questioned the concept of informed choice, arguing that once in place a screening programme should be vigorously promoted*.  P: *The majority of participants expressed positive attitudes towards bowel cancer screening, identifying items highlighting the benefits of the programme as important for others to know.* |
| Austin  2009  UK([34](#_ENREF_34)) | | All: 53  Range  50-78 | African-Caribbean, Gujarati Indian, Pakistani, White-British | High | | HBM | | Framework analysis approach | | K: *Most participants expressed limited awareness of bowel cancer and cited this as a barrier to screening attendance.*  C/B: *Anxiety regarding the invasiveness of the test, the bowel preparation and fear of a cancer diagnosis were common barriers across all ethnic groups.*  C: *Language difficulties, failure to meet religious sensitivities and the expression of culturally influenced health beliefs were all discussed as specific barriers to uptake*. |
| Jones  2010  USA([35](#_ENREF_35)) | | All: 40  Range  45-75 | N/R | Low | | N/R | | Thematic analysis | | K: *Lack of information.*  P: *Participants also cited barriers that have little documentation in the literature, such as low self-worth, “para-sexual” sensitivities, fatalism, negative past experiences with testing, and skepticism about the fınancial motivation behind screening recommendations.*  C/B: *Fear and the bowel preparation as the most important barriers to screening.*  HCS: *The role of physicians, and access to care.* |
| Varela  2010  USA([36](#_ENREF_36)) | | All: 35  Mean  62.5 | Hispanic-American | N/R | | Outline of topics based on available screening colonoscopy literature provided by Lina Jandorf (Second author), used to guide the focus groups | | N/R | | C/B: *Reasons for getting screened included peace of mind; influence from family and friends; and wanting to prevent CRC.*  *Barriers included fear of finding cancer and fear of the examination*. |
| Hatcher  2011  USA([37](#_ENREF_37)) | | All: 17  Patients:  ≥50 | N/R | Mixed | | N/R | | Thematic analysis | | K: *Participants conceptualized their own barriers as fear, inadequate knowledge.*  C/B: *Features of the screening tests themselves*.  HCS: *Distrust of the medical system and providers*, *and to a lesser degree than anticipated, financial limitations; and more pressing health concerns*. |
| James  2013  USA([38](#_ENREF_38)) | | All: 29  Range  ≥50 | American Indian | N/R | | N/R | | Thematic analysis | | K: *Men in the study felt that awareness about CRC was low, and people were interested in learning more.*  HCS: Insurance and cost; negative perception of clinicians. |
| Ramos  2013  Spain([39](#_ENREF_39)) | | 46  Range  50-69 | Spanish  (Spain) | N/R | | N/R | | Thematic analysis | | K: *The participants requested more information on cancer and felt they were at risk, mainly because of their age.*  P: *The key element was diagnosis at an early stage. Until recently, cancer was considered an incurable disease but is currently perceived as a serious health problem that can be cured if diagnosed promptly.*  C/B: *Attitudes to colorectal cancer screening were generally positive, even to colonoscopy. Some barriers to screening were identified in women, such as a fear of having cancer.*  G: *Men tended to pay attention to symptoms while women tended to ignore them.* |
| In-depth interviews | | | | | | | | | | |
| *Quality: Meeting ≥ 8/10 CASP criteria* | | | | | | | | | | |
| Taylor  2000  UK([40](#_ENREF_40)) | All: 60  Range  55-64 | | N/R | | N/R | | N/R | | N/R | C/B: *The sensations caused by air in the bowel were also a source of embarrassment to some interviewees.*  HCS: *Information giving—When interviewees referred to staff as “helpful” they frequently linked this with positive comments about the way staff explained procedures, volunteered information, answered and encouraged questions: “It was all explained and we were talked through it all the way—I thought it was marvellous.”*  G: *Male embarrassment in comparison to female familiarity with medical examinations: “It’s not like you’re a woman and you go and have babies”.*  *One woman said she would have been less embarrassed with a female doctor.* |
| Denberg 2005  USA([41](#_ENREF_41)) | F: 27  M: 25  Range  >50 | | Hispanic,  AA,  White-American, Other | | Mixed | | N/R | | Grounded Theory | K: *Only 40% of patients were aware of alternative screening options.*  P: *Lack of perceived risk for CRC, fear of pain.*  C/B: *Concerns about modesty and the bowel preparation*.  *Women reported more concerns about modesty and other aspects of the procedure than men.*  HCS: *Scheduling challenges, long waiting times.* |
| Frew  2005  UK([42](#_ENREF_42)) | All: 106  Mean  55.5 | | British | | N/R | | N/R | | N/R | C/B: *Individual preferences were subjective and dependant on attitudes towards a variety of method characteristics, such as discomfort, convenience and perceived sophistication.*  SES: *Characteristics such as age and low income, which had predicated preferences in the questionnaire study.* |
| Shokar  2005  USA([43](#_ENREF_43)) | All: 30  Mean  White:65  AA: 65.3  Hispanic:63.1  Range  51-80 | | White-American,  AA,  Hispanic | | N/R | | HBM | | Call-recall technique | K: *All groups, but particularly minority groups, lack knowledge of cancer, CRC, and screening. They did not understand the concept of screening, had difficulty listing common cancer and CRC screening tests, and had trouble understanding simplified medical terms and procedure names*.  P: *Patients were hopeful about the benefit of early cancer diagnosis but remained reluctant to get tested if they are symptom free.* |
| Wackerbarth2005  USA([44](#_ENREF_44)) | All: 30  Range  48-55  Mean  54 | | White-American,  AA,  Asian,  Native American | | High | | HBM | | Thematic analysis | C/B: *Concern for one's personal well-being, competing demands, preparing for the procedure, the screening process, gender concerns, fear of having cancer, feeling healthy, cost, the experiences of others, and turning 50 years old.* |
| Choe  2006  USA([45](#_ENREF_45)) | All: 30  Range  50-79 | | Chinese American | | Low | | Bastani’s Health Behaviour Framework([46](#_ENREF_46)) | | Thematic analysis | P: *Participants presumed that FOBT is unnecessary in the absence of symptoms.*  C: *When asked about CRC, interviewees discussed such concepts as maintenance of positive energy (qi) and spirit (jing shen) and moderation of exercise and diet. Interviewees believed that colorectal cancer was caused by diets high in food with ‘heat’ (hus qi) or by intestinal toxins from frequent constipation.*. |
| Chapple  2008  UK([47](#_ENREF_47)) | All: 44  Range  >58 | | White British, Black Caribbean  (UK) | | N/R | | HBM | | Thematic analysis,  constant comparative analysis | C/B: *Reasons for accepting screening included: knowing someone with cancer, previous positive experience of women's screening programmes, being a "good citizen", previous bowel problems, and encouragement from others.*  *Reasons for reluctance to take part included: feeling healthy, fear of outcome, lack of time, disgust at the idea of handling stools, concern about posting samples in the mail, misunderstanding instructions, and past (negative) experience or fear of colonoscopy.* |
| Green  2008  USA([48](#_ENREF_48)) | All: 40  Range  53-70  Mean  60.3 | | Latino-American, Non-Latino White-American | | Low | | N/R | | Framework method | P: *Fear of pain or complications of colonoscopy and fear of diagnosis (cancer).*  HCS: *Scheduling, financial, transportation, and language difficulties*.  *Lack of provider recommendation including not hearing about colonoscopy or not understanding the preparation instructions.*  C/B: *Lack of desire or motivation, including "laziness" and “procrastination";*  *Dissuasion by others’ influencing participants' decision regarding colonoscopy.* |
| Hoffman Goetz  2008  Canada ([49](#_ENREF_49)) | F: 74  M: 26  Range  50-90 | | N/R | | Middle | | N/R | | Constant comparative | K: *Surprise at CRC information, and barriers to understanding cancer information*.  HCS: *Physician screening recommendations*. |
| Lasser  2008  USA([50](#_ENREF_50)) | All: 23  Mean  62.3 | | White-American,  AA, Hispanic/ Latino | | Low | | N/R | | Constant comparative analysis | K: *Unscreened patients identified lack of symptoms as the reason they had not been screened*.  P*: Patients, but not their physicians, cited fatalistic views about cancer as a barrier.*  HCS: *Unscreened patients cited lack of trust in doctors as a barrier to screening whereas few physicians identified this barrier; A doctor's recommendation, or lack thereof, significantly influenced patients' decisions to be screened.* |
| Wackerbarth 2008  USA([51](#_ENREF_51)) | All: 30  Mean  54 | | White-American, AA, Asian or Pacific Islander, Native American or Alaskan Native | | Mixed | | Kurt Lewin’s field theory([52](#_ENREF_52)) | | Constant comparative analysis | *C/B: “internal” and “external” factors that “pushed” a person away from or “pulled” a person toward CRC screening. Internal factors included health beliefs and prior experiences with health screening. External factors included the influences of health care providers, family, friends, and health insurance coverage.* *7 different patterns found for the decision making process among the participants.* |
| Ge  2009  USA([53](#_ENREF_53)) | All: 44  Range  50-77  Mean  61 | | AA, Hispanic-American, Chinese-American, non-Hispanic White-American, Mixed cultural heritage | | N/R | | N/R | | Thematic analysis | HCS: *Interpersonal relationship themes such as power distance, trust, directness/ indirectness, and an ability to listen, as well as personal health beliefs, emerged as affecting patients' definitions of provider-patient effective communication.* *In discordant physician-patient interactions physicians did not solicit or address cultural barriers to CRC screening and patients did not volunteer culture-related concerns regarding CRC screening.*  Note: included observation |
| Goldman 2009  USA([54](#_ENREF_54)) | All: 147  Range  >18 | | DominicanAmerican, Puerto Rican-American | | Mixed | | Fields-of-interaction Theoretical framework([55](#_ENREF_55), [56](#_ENREF_56)) | | N/R | K: *Many participants had not previously heard of CRC*  P: *The most commonly mentioned cause of CRC was anal sex. Also considered risks were "bad food," digestion leading to constipation, and strained bowel movements. Screening barriers included stigma, misperceptions, embarrassment, and machismo.* |
| Severino  2009 Australia([57](#_ENREF_57)) | All: 20  F: 13  M: 7  Range  54-78 | | Italian-Australian | | N/R | | HBM, Kleinman & Helman’s cultural explanatory models for CRC([58](#_ENREF_58)) | | Thematic  Framework analysis | C: *Participants articulated specific beliefs about the nature of cancer, risk factors, prevention possibilities, and variety of potential barriers and benefits to FOBT. Although participants' beliefs overlapped with conventional medical models of cancer, the results also demonstrated the presence of specific cultural perceptions that might influence FOBT participation.* |
| Winterich 2009  USA([59](#_ENREF_59)) | M:64  Range  40-64 | | White American,  AA | | Mixed | | Masculinity and health theory framework | | Identified major and minor themes | G: *Some men disliked colonoscopies because they associated any penetration as an affront to their masculinity.* *Many men avoid or dread cancer screening exams involving the rectum because of concerns related to masculinity and sexuality.* |
| Von Wagner 2009  UK([60](#_ENREF_60)) | All: 49  F: 35  M: 14  Range  57-92  Mean  71 | | British | | N/R | | N/R | | Thematic analysis | K: *Information provision was also an important determinant of experience*.  HCS*: Social interactions with staff were perceived as very important in colouring the whole experience, particularly in controlling the feelings of embarrassment, which was critical for all procedures.*  *Verbal feedback was most common during colonoscopy and invariably reassuring.* |
| Aubin-Auger  2011  France([61](#_ENREF_61)) | F: 11  M: 13  Range  50-74  Mean  60 | | Parisian | | N/R | | Axial Coding framework | | Grounded theory | *K: Many patients had a poor knowledge about CRC screening, in particular those who were male, and being >60 years. Some thought that screening was only useful in the case of high-risk familial CRC*. *Lack of symptoms was one of the main reasons for doubting the test’s usefulness.*  P: *Participants were afraid of having responsibility for the testing process and feared that a poor technical performance could induce a false positive or negative result.* *Screening for cancer did not match some patients’ perception of health* care. *These patients preferred to manage their health in a different way, such as eating healthy food or exercise.*  *Forgot to perform the test; others lacked time or were indifferent.*  *HCS: Some patients stressed that feeling their GP’s involvement was important to them.* |
| Bong  2011  New Zealand([62](#_ENREF_62)) | All: 25  Mean  56 | | New Zealand-Chinese (born in Asian countries) | | High | | N/R | | Grounded theory | P*: Participants valued health care and preventive health measures*  *were highly prioritised. However, CRC suffered from the 'poor cousin' syndrome whereby other more highly publicised cancers, such breast cancer, or skin cancer, were perceived to be more relevant and serious, thus marginalising the perceived priority of CRC screening.*  HCS: *Patient practitioner interaction was also found to be influential in the patient's decision to seek screening.*  C: *Overall, participants paid close attention to their bodies' balance and were proactive in seeking medical advice*. |
| Gwede  2011  USA([63](#_ENREF_63)) | All: 62  Range  50-76 | | AA (US born); Carribean born-American; Haitian born-American | | Mixed | | N/R | | Content analysis, Constant comparison | C*: No major differences among the 3 ethnic subgroups in their overall perceptions of cancer as well as their attitudes related to barriers, motivation, and resources for CRC screening. Subtle differences in perceptions of curability, preventive practices, and preferred sources of information* |
| Ward  2011  Australia([64](#_ENREF_64)) | Overall: 121  Iranian: 24 Greek: 23 Vietnamese: 24 Australian: 27 Indigenous: 23  Range  35-75 | | Greek Vietnam-ese  Iranian  Anglo -Australian Indigenous | | N/R | | N/R | | Mixed methods; Inductive and deductive coding process-exploratory | K: *Very few participants were aware of CRC or CRC screenings. Low knowledge, and hence lack of awareness of high prevalence or mortality rates from CRC, in addition to potential for prevention through screening, was cited as a major barrier to participation.*  C/B: Peace of mind.  HCS: *Lack of a recommendation was the most commonly cited* barrier.  SES*: Language barriers were considered a key issue for the majority of non-English-speaking participants.* |
| Winterich 2011  USA([65](#_ENREF_65)) | M: 65  Range  40-64 | | AA, White-American | | Mixed | | Explanatory models of illness | | Thematic analysis | C/B: *Education was associated with knowledge about CRC and the colonoscopy. Screening status and education were related to FOBT knowledge.*  G: *Men knew little about the sigmoidoscopy* |
| Bapuji  2012  Canada([66](#_ENREF_66)) | Physicians: 15; Patients: 27; family members: 19  Range (family members)  ≥50 | | N/R | | N/R | | N/R | | An interpretive description approach, Grounded approach | K: *Individuals at average-risk for* *CRC identified that FOBT instructions were confusing and burdensome, which in turn served as a barrier in their adherence to FOBT screening.* |
| Getrich  2012  USA([67](#_ENREF_67)) | 8 Providers  Clinic staff: 6;  Patients  52  Range  >50 | | Health care providers mostly Non-Hispanic White-American; staff mostly Hispanic Patients: Hispanic | | N/R | | N/R | | Iterative analysis;Thematic analysis | G*: We found that machismo served as a dynamic influence on men’s health-seeking behaviors; however, it was conceptualized differently by two distinct Hispanic subpopulations, and therefore appeared to play a different role in shaping their screening attitudes and behaviors. Machismo emerged as more of an influence for Mexican men, who expressed concern over colonoscopies being potentially transformative and/or stigmatizing, but was not as salient for Hispanos, who viewed the colonoscopy as “strictly medical,” and were more concerned with discomfort and pain.* |
| Greiner  2012  USA([68](#_ENREF_68)) | F: 26  M: 24  Range  50-78  Mean  60 | | AA, Hispanic/Latino/ non-Hispanic White-American | | N/R | | Fishbein and Ajzen’s Theory of planned behaviour([69](#_ENREF_69)) | | Constant comparative | *C/B: FOBT specific themes included: sample collection and return. For colonoscopy screening, themes included: scheduling, intervention questions, colonoscopy preparation, and transportation.*  HCS: *Personal concerns, reminders, communication with healthcare providers and obtaining test results.* |
| Lobchuk 2012  Canada([70](#_ENREF_70)) | 27 patients, 19 family members  Mean  66 | | N/R | | N/R | | Social support theory | | Content analysis and constant comparative techniques. | C/B: Family members and friends exhibited various *instrumental, emotional, informational, and appraisal roles outside the medical encounter in promoting adherence to FOBT screening recommendations. With increasing emphasis on preventive health behaviours, the vital role of ‘family as partner’ in promoting adherence to CRC screening should be recognized and supported by the health care system, policies, and care providers.* |
| Manne  2012  USA([71](#_ENREF_71)) | All: 36  Mean  F:61.9  M: 64.5  Range: 51-89 | | White-American | | N/R | | Interdependence model | | Thematic analysis | C/B*: Direct partner effects were evidenced when the impact of one spouse on the CRC screening decision of the other was clearly defined and intended. Three direct partner effect themes were leadership, persuasion, and partnership. Indirect partner effects were evidenced by one spouse considering the information, experience, or actions of the other in ways that informed CRC screening decision-making, even if that influence was not intentional or specifically directed at CRC screening. Three indirect partner effect themes were companionship, support, and peer socialization.* |
| Lee  2013  USA([72](#_ENREF_72)) | All: 26F: 15  M:11  Range  50-88 | | Korean American | | N/R | | N/R | | Thematic analysis; Reflexive thinking | *K: Seeing a doctor only if they have symptoms.*  *Refusing health information.*  *P: Believing that they would not get CRC; balancing the will to stay healthy and fatalism.*  *C/B: Valuing their families before themselves.* |
| Ritvo  2013  Canada([73](#_ENREF_73)) | F: 49  M: 32  Mean  F:63.7  M: 65.2 | | N/R | | N/R | | Gender differences in disease prevention/PAPM | | Constant comparative | *K: Men were less knowledgeable than women.*  *P: Avoidant procrastination with underlying fatalism, unnecessary health care and uncomfortable vulnerability for males*. Men kept decision-making processes vague and emotionally distanced (i.e. at ‘arm’s length’).  *C/B: Bodily intrusion, perforation anxiety, and embarrassment for females*.  G: *Women had more consistent physician relationships, were more screening- knowledgeable and better able to articulate views on screening. Men reported less consistent physician relationships.* |
| Sly  2013  USA([74](#_ENREF_74)) | All: 16  Mea  60 | | AA | | Low | | Social ecological framework | | Thematic content analysis | *K: Lack of knowledge about CRC.*  *C/B: Fear/anxiety about the procedure, including unknown expectations, fear of pain, and fear of cancer diagnosis and believing that cancer leads to death.*  *HCS: Inadequate physician communication about CRC and the colonoscopy exam. Participants felt that greater communication and explanation from their physician might help allay their fears.* |
| Oster  2014  Australia([75](#_ENREF_75)) | All:35  Range  50-74 | | N/R | | N/R | | Hegeomonic Masculinity | | Theoretical thematic analysis | P: Preventative health care in general as being important to them.  *C/B: Discourses of responsibility, risk, rationality and control in discussing their views of screening for CRC.*  *The decision [to screen] occasionally involved some influence from partners/spouses and health professionals.* |
| Palmer  2008  USA([76](#_ENREF_76)) | All: 36  Range: 51-89  Mean 63.2; Husbands64.5, Wives 61.9 | | White-American | | Mixed | | PRECEDE | | Grounded theory | K: Adherent individuals *demonstrated a more in-depth understanding of CRC screening including the purpose of the screening, types of CRC screening tests, and appropriate testing intervals.*  P: *A theme that emerged only in nonadherent participants dealt with the fear of detection of CRC.*  C/B: *CRC screening priority was reduced when chronic health conditions existed and when individuals faced financial and personal obligations*.  G: *Nonadherent women believed that CRC is a disease that affects primarily men and therefore women are at lower risk.*  HCS: *Adherent men and women discussed the importance of healthcare provider recommendations in their decision to screen* |
| *Quality: Meeting 4 – 7/10 CASP criteria* | | | | | | | | | | |
| Holt  1991  USA([77](#_ENREF_77)) | All: 20 | | N/R | | N/R | | N/R | | Close-textual analysis | HCS: *Respondents reported that their physician's recommendation had a strong positive influence on their decision to have sigmoidoscopic screening.*  *In all cases, the patients stated that they would not have had a sigmoidoscopy without the recommendation of their physician.*  C/B: *Family and personal experiences with cancer.*  *Respondents were little influenced by exposure to the media or by famous personalities.* |
| McCaffery 2001  UK([78](#_ENREF_78)) | All: 60  Range  55-64 | | N/R | | N/R | | N/R | | N/R | P*: The findings suggest that low perceived susceptibility to bowel cancer.*  *C/B: Family history or absence of bowel symptoms was an important factor in the decision to decline screening. Procedural barriers such as embarrassment, pain/discomfort and perceived unpleasantness of the test were reported as relatively minor, although the test was considered more physically intrusive than other screening tests.*  *Avoidant attitudes emerged as an important theme and were reported by a third of respondents*. |
| O'Malley 2004  USA([79](#_ENREF_79)) | All:40  F: 18  M: 22  Range  50-75 | | AA, Latino, American Indian | | Low | | PPM | | Content analysis | K: *Low level of patient knowledge about colorectal cancer screening, especially about the FOBT procedures. They also noted lack of knowledge about the test’s sensitivity, and the treatability of colorectal cancer when found at an early stage.*  *C/B: Procedural issues related to screening*  *HCS: Patients volunteered that clearer instructions from providers on how to take the samples (frequency, amount of stool needed,*  *food restrictions, etc.) would increase the likelihood that they would do the test in the future.*  SES: *Prevention often took a back seat to acute illness or to daily survival for persons with low incomes.* |
| Hou  2005  Taiwan([80](#_ENREF_80)) | F: 20  M:12  Range  39-58  Mean  42 | | Chinese | | N/R | | N/R | | Immersion/crystallization | K: *Intentions to have FOBT were influenced by current symptoms or family history*  C/B*: Avoidance of facing problems. Embarrassment and lack of acceptance of preventative behaviour.*  HCS*: Physician recommendation and self-health condition were more important for the intention to use flexible sigmoidoscopy or colonoscopy*.  C: *Misconceptions about cancer screening and benefits of screening.* |
| Ogedegbe 2005  USA([81](#_ENREF_81)) | F: 187  Range  50-69 | | AA, Latino | | Low | | PPM | | Content analysis | K: *The most common barriers were a lack of cancer screening knowledge*  P: *The perception of screening as routine was cited as a facilitator far more commonly for mammography and Pap tests than for CRC screening.*  Patients' perception of good health or absence of symptoms attributable to ill health  C/B*: Other facilitators of cancer screening identified by patients included personal medical history, presence of a symptom, and fear of pain from the cancer test*.  HCS: *Clinician recommendation was the most commonly cited encouragement to cancer screening.* |
| Lasser  2008  USA([82](#_ENREF_82)) | F: 14  M: 4  Mean  71.9 | | Hispanics, White-American  AA, Mixed, Other. | | Low | | PPM | | N/R | HCS: *Sharing of power and responsibility, the use of empathy, and treating the patient like a person were all important communication strategies which seemed to help address barriers to colonoscopy. PCP persistence as well as rapport and trust also appeared to facilitate receipt of CRC screening*. |
| McQueen  2009  USA([83](#_ENREF_83)) | F: 47  M: 17  Range  50-70 | | White-American,  AA, Hispanic | | Mixed | | N/R | | Thematic analysis Patient-audio recorded with physicians | P: *Patients expressed concerns about pain, side effects, and test invasiveness.*  C: ‘*I’m of the opinion that if it ain’t broke, don’t fix it,’ or ‘never had any reason to’*  SES*: Cost, distance to the clinic, needing a ride home, and scheduling/making time for the exam.* |
| Palmer  2010  USA([84](#_ENREF_84)) | All: 60  Range  50-76 | | AA | | Mixed | | N/R | | Thematic analysis | C/B: *Most individuals interviewed preferred colonoscopy as compared to FOBT. Previous participation in CRC screening influenced how individuals made decisions about CRC screening. Enabling individuals without CRC screening experience to first complete FOBT might prepare them to later participate in colonoscopy screening.* |
| Reeder  2011  New Zealand([85](#_ENREF_85)) | All: 50  F: 30  M:20  Range  50-71  Median  59 | | NZ European population  That lived in or had access to urban health care facilities | | N/R | | N/R | | Content analysis | P: *Participants believed early CRC lacked distinguishing signs and symptoms, but was treatable and suitable for screening, although slow development may undermine any sense of urgency.*  *C/B: FOBT inaccuracies caused concern, particularly false negatives, but ongoing testing could reduce anxiety. Specimen collection was awkward, challenged social norms and individual squeamishness, but provided peace of mind, was painless, simple and private without high cost technological or professional involvement. CRC lacked public profile, highlighting government responsibility, before programme implementation, to resource high-profile education, largely through* TV.  HCS: *General practitioner support and promotion was seen as critical.*  *Inadequate health system capacity and resourcing was problematic.*  G: *Lacking preventive attitudes and experience of health responsibilities and screening, men were less likely to participate than women.* |
| Tarasenko 2011  USA([86](#_ENREF_86)) | All: 41  Range  51-76  Mean  63 | | White-American | | Mixed | | N/R | | Thematic analysis | P: *Prevention was a secondary concern compared to disease management.*  *Preparation necessary for colonoscopy might interfere with disease management, particularly in the case of diabetes or other conditions requiring medication.*  *C/B: Physical limitations, including mobility concerns, might make screening preparation difficult.*  *SES: Inadequate finances force people to choose disease management (which they know was necessary for their survival) or prevention (which seemed hypothetical and less urgent).* |
| Tarasenko 2011  USA([87](#_ENREF_87)) | All: 30  Mean  54 | | White-American, AA,  Asian-American, Native-American | | Mixed | | PPM | | N/R | C/B: *Commonly expressed barriers including unpleasant screening modality, lack of health insurance, and shortage of gastroenterologists to perform colonoscopy, participants described the ways in which multiple morbidities undermine screening. Barriers specific to multiple morbidity include competing demands from other conditions, such as financial pressures, physical limitations, and worries over regimen interference* |
| Foo  2012 Singapore([88](#_ENREF_88)) | All: 72  Age: >50 | | Chinese | | N/R | | N/R | | Thematic analysis | K: *CRC screening awareness was poor.*  *Having no symptoms was the most common barrier.* |
| Javanparast 2012 Australia([89](#_ENREF_89)) | All: 121  Range  50-75 | | Greek, VietnameseIranian, Anglo-Australian, Indigenous | | N/R | | N/R | | N/R | K: *Lack of knowledge about bowel cancer and its screening tests across all groups, and that the tests were viewed as unpleasant.*  *P: Members of all groups expressed positive attitudes towards cancer screening.*  *C/B: Issues that differed across groups included language barriers, fatalistic views about cancer, embarrassment, the importance of privacy,*  *HCS: The significance of a doctor's recommendation, moral obligations.*  *C: Culture-specific concerns.* |
| Thompson 2012  New Zealand([90](#_ENREF_90)) | Maori:30;  non-Maroi:50  Range  Maori  40-60  Non-Maroi  50-70 | | Māori and non-Māori (European/Anglo Saxon) | | N/R | | N/R | | Thematic analysis | G*: Perceived marginalization of men’s health with a sense that women had advocated for, and therefore monopolized, screening while men’s health had been left unattended. There were also perceptions of women’s responsibility for ensuring men’s access to health services. While health is perceived as being a feminine matter, it may be difficult to encourage men to engage in preventative behaviours, such as taking up the offer of screening. This article also highlights the heterogeneity of men, where different performances of masculinities were presented. A stereotypical ‘staunch’ or ‘macho image’ discourse was evident in some of the interviews where much emphasis was on maintaining and controlling bodily boundaries*. |
| Wong  2013  USA([91](#_ENREF_91)) | All: 29    Mean 68 | | AA | | Low | | N/R | | Content analysis | K*: Lack of knowledge about the importance of screening.*  *Improved knowledge about colonoscopies is a significant facilitator to adherence.*  *C/B: Physician recommendation.* |
| *Quality: Meeting ≤ 3/10 CASP criteria* | | | | | | | | | | |
| Brouse  2003  USA([92](#_ENREF_92)) | F: 6  M: 2  Range  54-72  Mean  61.4 | | Hispanic,  AA,  White-American | | Low | | N/R | | Intensive qualitative analysis of the obtained information using pre-defined categories/ descriptive qualitative analysis | *K:The main barriers were lack of CRC knowledge*  *P: Perceived lack of social support, and fear and concomitant denial that CRC ‘won’t happen to me.’*  *HCS: Lack of communication skills and self-efficacy in skills to act on motivation, unavailability and inaccessibility of FOBT kits.* |
| Good  2010  USA([93](#_ENREF_93)) | F: 131  M: 66  Mean  47.6 | | AA,  White-American, Hispanic, Asian, Other | | N/R | | N/R | | Thematic analysis | *K: Lack of awareness: “No one told me that I should have a screening”.*  *P: Fear: “I am afraid what the doctor will find”.*  *Indifference: “I really do not want to know if I have colon cancer”.*  *SES: Transportation: “I have no transportation to get there and back home”.*  *Inconvenience: “The time when the office or hospital is operand is not a good time for me I work during the weekday and cannot get a day off“.* |
| In-depth interviews and focus group | | | | | | | | | | |
| *Quality: Meeting ≥ 8/10 CASP criteria* | | | | | | | | | | |
| Clavarino  2004  Australia([94](#_ENREF_94)) | | In depth interview  F: 7  M: 5  No age range  Focus groups:  F: 9  M: 9  Range  52-70  Mean  58 | N/R | | N/R | | N/R | | Iterative and inductive analysis. | K: *Awareness of cancer was high, prior experience with FOBT.*  *C/B: Respondents knew of someone, within their family or amongst their friends, who had experienced some form of cancer. This type of experience worked in two ways, it either motivated participation, or created such fear that it precluded participation: ‘. . . I just don’t want to know.’*  *HCS: With few exceptions, participants commented favourably on this approach kits were sent from the local GPs using the mail service. Some participants were especially motivated to complete the FOBT, since the kit was sent by the GP* |
| Beyer  2011  USA([95](#_ENREF_95)) | | F: 30M: 30  Mean  61.8 | White-American, Taidam, Lao, Hispanic  (US) | | Mixed | | The conceptual model of Salant and  Gehlert([96](#_ENREF_96)), with modifications based on Behringer and Friedell([97](#_ENREF_97)) | | Concept mapping-exploratory | K*: Nutritional risk factors associated with CRC, people don’t hear much about the tests.*  *P: Screening could result in bad news.*  *HCS: Screening tests are not covered by insurance.* |
| James  2011  USA([98](#_ENREF_98)) | | All: 38  Mean  56.5  Range  47-75 | AA | | Mixed | | PAPM, HBM, Theory of planned behaviour | | Standard text analysis, “modified” grounded theory | *K: Themes included low CRC knowledge.*  *P: Low perceived norms.*  *C/B: High barriers, and other screening beliefs.* |
| Oster  2013  Australia([99](#_ENREF_99)) | | All: 63  Telephone interview: 30  Focus group: 33  Range  50-75 | N/R | | N/R | | Preventive Health Model/ PAPM | | Framework analysis | P*: “Wanting to know” their CRC status, which operated on a continuum ranging from wanting to know, through varying degrees of ambivalence, to not wanting to know. The majority of participants expressed ambivalence about CRC screening.*  *C/B: Opportunity to screen without being too inconvenienced.* |
| Surveys (with a qualitative component) | | | | | | | | | | |
| *Quality: Meeting ≥ 8/10 CASP criteria* | | | | | | | | | | |
| Garcia  2011  Spain([100](#_ENREF_100)) | | All: 560  F: 276  M: 284  Range  50-69 | Spanish  (Spain) | N/R | | N/R | | Thematic analysis | | P: *Barriers for participation mentioned in focus groups were competing perceived for other health problems and other demands as well as misunderstanding about personal relevance of the screening.* |
| Brouse  2004  USA([101](#_ENREF_101)) | All: 226  Range  52-80 | | AA,  White-American, Hispanic, Asian | | Low | | PPM | | Content analysis | K: *Most frequently observed barrier was lack of familiarity with CRC screening guidelines and tests.*  HCS: *Availability and accessibility to screening tests was a barrier that was difficult to overcome for many participants.* |
| *Quality: Meeting 4 – 7/10 CASP criteria* | | | | | | | | | | |
| Hou  2005  Taiwan([102](#_ENREF_102)) | All: 304  Mean  48.2 | | Chinese | | Middle | | N/R | | N/R | P: FOBT is convenient, simple and easy to use, and safe  *C/B:* questioned the reliability and validity of FOBT*,* multiple testing*, sit-style toilets not always available*  SES: worried about FOBT cost*, requires a certain educational level to comprehend and follow instructions* |
| Robb  2008  UK([103](#_ENREF_103)) | All: 875  Range  >16 | | Indian, Pakistani, Bangladeshi, Caribbean, African, and Chinese  (UK) | | N/R | | N/R | | Content analysis | *K: All respondents showed a notable lack of knowledge about causes of colorectal cancer, which was more pronounced in ethnic minority than white-British adults.*  *C/B: Interest in FS screening was uniformly high (>60%), with more than 90% of those interested saying it would provide 'peace of mind'. The most frequently cited barrier to screening 'in your community' was embarrassment, particularly among ethnic minority groups* |
| Shaw  2012  USA([104](#_ENREF_104)) | | All: 297  Subsample:  In-depth interview35  focus groups  47;chronic disease diaries: 1;  Home observ-ations: 12 | White-American,  AA, VietnameseLatino | | Low | | N/R | | N/R | C/B*: Never having had a cancer screening was generally associated with more unfavorable attitudes towards all screenings. Qualitative interviews indicate the importance of information circulated through social networks in shaping attitudes towards cancer screenings.* |

Abbreviations: AA, African-American; HBM, Health Belief Model; PPM, preceed-proceed model; PAPM, Precaution adoption process model; N/R, not reported

**Supplementary Table S3** Quality assessment of 94 included studies using CASP critical appraisal method.

| Lead Author (Year) | CASP Question | | | | | | | | | | Score (Max is 10) |
| --- | --- | --- | --- | --- | --- | --- | --- | --- | --- | --- | --- |
| **1** | **2** | **3** | **4** | **5** | **6** | **7** | **8** | **9** | **10** |
| Aubin-Auger et al (2011)([61](#_ENREF_61)) | Y | Y | Y | Y | Y | Y | N | Y | Y | Y | 9 |
| Austin et al (2009)([34](#_ENREF_34)) | Y | Y | Y | Y | Y | U | N | U | Y | Y | 7 |
| Bapuji et al (2012)([66](#_ENREF_66)) | Y | Y | Y | U | Y | U | Y | Y | Y | Y | 8 |
| Baron-Epel and Klin (2009)([17](#_ENREF_17)) | Y | Y | N | Y | Y | N | N | Y | Y | Y | 7 |
| Bass et al (2009)([24](#_ENREF_24)) | Y | Y | Y | Y | Y | N | N | Y | Y | Y | 8 |
| Beeker et al (2000)([1](#_ENREF_1)) | Y | Y | Y | Y | Y | Y | U | Y | Y | Y | 9 |
| Beyer et al (2011)([95](#_ENREF_95)) | Y | Y | Y | Y | Y | Y | Y | Y | Y | Y | 10 |
| Bong and McCool (2011)([62](#_ENREF_62)) | Y | Y | Y | Y | Y | Y | Y | N | Y | Y | 9 |
| Brouse et al (2003)([92](#_ENREF_92)) | Y | Y | N | N | N | N | N | N | Y | N | 3 |
| Brouse et al (2004)([101](#_ENREF_101)) | Y | Y | Y | Y | Y | U | U | Y | Y | Y | 8 |
| Chapple et al (2008)([47](#_ENREF_47)) | Y | Y | Y | Y | Y | N | N | Y | Y | Y | 8 |
| Choe et al (2006)([45](#_ENREF_45)) | Y | Y | Y | Y | Y | Y | U | N | Y | Y | 8 |
| Clavarino et al (2004)([94](#_ENREF_94)) | Y | Y | Y | Y | Y | Y | Y | Y | Y | Y | 10 |
| Coronado et al (2006)([10](#_ENREF_10)) | Y | Y | Y | Y | Y | U | Y | U | Y | Y | 8 |
| Denberg et al (2005)([41](#_ENREF_41)) | Y | Y | Y | U | Y | N | Y | Y | Y | Y | 8 |
| Diaz et al (2011)([25](#_ENREF_25)) | Y | Y | Y | Y | Y | N | N | Y | Y | Y | 8 |
| Dube et al (2005)([8](#_ENREF_8)) | Y | Y | Y | Y | Y | Y | Y | Y | Y | Y | 10 |
| Ekberg et al (2014)([30](#_ENREF_30)) | Y | Y | Y | Y | Y | U | Y | Y | Y | Y | 9 |
| Feeley et al (2009)([18](#_ENREF_18)) | Y | Y | Y | Y | Y | U | Y | Y | Y | Y | 9 |
| Fernandez et al (2008)([14](#_ENREF_14)) | Y | Y | Y | Y | Y | U | Y | Y | Y | Y | 9 |
| Foo et al (2012)([88](#_ENREF_88)) | Y | Y | Y | Y | Y | N | N | N | Y | Y | 7 |
| Francois et al (2009)([19](#_ENREF_19)) | Y | Y | Y | Y | Y | Y | Y | Y | Y | Y | 10 |
| Frew et al (2005)([42](#_ENREF_42)) | Y | Y | Y | Y | Y | U | Y | U | Y | Y | 8 |
| Friedemann-Sanchez et al (2007)([15](#_ENREF_15)) | Y | Y | Y | Y | Y | U | U | Y | Y | Y | 8 |
| Fyffe et al (2008)([32](#_ENREF_32)) | Y | Y | Y | U | Y | U | Y | Y | Y | Y | 8 |
| Garcia-Dominic et al (2012)([27](#_ENREF_27)) | Y | Y | Y | Y | Y | Y | Y | Y | Y | Y | 10 |
| Garcia et al (2011)([100](#_ENREF_100)) | Y | Y | Y | Y | Y | N | N | N | N | Y | 6 |
| Ge et al (2009)([53](#_ENREF_53)) | Y | Y | Y | Y | Y | Y | Y | Y | Y | Y | 10 |
| Getrich et al (2012)([67](#_ENREF_67)) | Y | Y | Y | Y | Y | U | U | Y | Y | Y | 8 |
| Goel et al (2004)([5](#_ENREF_5)) | Y | Y | Y | Y | Y | Y | Y | Y | Y | Y | 10 |
| Goldman et al (2009)([54](#_ENREF_54)) | Y | Y | Y | Y | Y | Y | Y | Y | Y | Y | 10 |
| Goldsmith and Chiaro (2008)([16](#_ENREF_16)) | Y | Y | Y | Y | Y | U | Y | Y | Y | Y | 9 |
| Good et al (2010)([93](#_ENREF_93)) | Y | Y | N | U | U | N | N | N | Y | N | 3 |
| Goodman et al (2006)([12](#_ENREF_12)) | Y | Y | Y | Y | Y | Y | Y | Y | Y | Y | 10 |
| Green et al (2008)([48](#_ENREF_48)) | Y | Y | Y | Y | Y | Y | Y | Y | Y | Y | 10 |
| Greiner et al (2012)([68](#_ENREF_68)) | Y | Y | Y | Y | Y | N | Y | Y | Y | Y | 9 |
| Greiner et al (2005)([9](#_ENREF_9)) | Y | Y | Y | Y | Y | U | Y | Y | Y | Y | 9 |
| Greisinger et al (2006)([13](#_ENREF_13)) | Y | Y | Y | Y | Y | Y | Y | Y | Y | Y | 9 |
| Gwede et al (2011)([63](#_ENREF_63)) | Y | Y | Y | Y | Y | Y | Y | Y | Y | Y | 10 |
| Hatcher et al (2011)([37](#_ENREF_37)) | Y | Y | Y | Y | U | U | Y | U | U | N | 5 |
| Hoffman-Goetz et al (2008)([49](#_ENREF_49)) | Y | Y | Y | Y | Y | N | N | Y | Y | Y | 8 |
| Holmes-Rovner et al (2002)([3](#_ENREF_3)) | Y | Y | Y | Y | Y | Y | Y | Y | N | Y | 9 |
| Holt et al (2009)([20](#_ENREF_20)) | Y | Y | Y | Y | Y | Y | Y | Y | Y | Y | 10 |
| Holt (1991)([77](#_ENREF_77)) | Y | Y | Y | Y | Y | U | U | Y | Y | Y | 8 |
| Hou (2005)([102](#_ENREF_102)) | Y | Y | Y | Y | Y | N | N | Y | Y | Y | 8 |
| Hou (2005)([80](#_ENREF_80)) | Y | U | U | Y | Y | N | N | U | Y | Y | 5 |
| James et al (2011)([98](#_ENREF_98)) | Y | Y | Y | Y | Y | Y | Y | Y | Y | Y | 10 |
| James et al (2013)([38](#_ENREF_38)) | Y | Y | N | Y | Y | N | Y | U | Y | Y | 7 |
| Javanparast et al (2012)([89](#_ENREF_89)) | Y | Y | Y | Y | Y | U | U | U | Y | Y | 7 |
| Jilcott P et al (2013)([28](#_ENREF_28)) | Y | Y | Y | Y | Y | N | Y | Y | Y | Y | 9 |
| Jones et al (2010)([35](#_ENREF_35)) | Y | Y | Y | U | U | N | Y | U | Y | Y | 6 |
| Katz et al (2004)([31](#_ENREF_31)) | Y | Y | N | U | Y | Y | Y | N | N | N | 5 |
| Lasser et al (2008)([50](#_ENREF_50)) | Y | Y | Y | Y | Y | N | Y | U | Y | N | 7 |
| Lasser et al (2008) ([82](#_ENREF_82)) | Y | Y | Y | Y | Y | Y | Y | Y | Y | Y | 10 |
| Lee and Lee (2013)([72](#_ENREF_72)) | Y | Y | Y | Y | Y | Y | Y | Y | Y | Y | 10 |
| Lobchuk et al (2012)([70](#_ENREF_70)) | Y | Y | Y | U, | Y | N | Y | Y | Y | Y | 8 |
| Manne et al (2012)([71](#_ENREF_71)) | Y | Y | Y | Y | Y | Y | Y | Y | Y | Y | 10 |
| McCaffery et al (2001)([78](#_ENREF_78)) | Y | Y | Y | Y | Y | U | U | U | Y | Y | 7 |
| McQueen et al (2009)([83](#_ENREF_83)) | Y | Y | Y | U | Y | N | Y | Y | Y | Y | 8 |
| Molina-Barcelo et al (2011)([26](#_ENREF_26)) | Y | Y | Y | N | Y | U | Y | Y | Y | Y | 8 |
| O'Malley et al (2002)([4](#_ENREF_4)) | Y | Y | Y | Y | Y | Y | Y | Y | Y | Y | 10 |
| O'Malley et al (2004)([79](#_ENREF_79)) | Y | Y | Y | Y | Y | U | U | Y | Y | Y | 8 |
| O'Sullivan and Orbel (2004) | Y | Y | Y | Y | Y | Y | Y | Y | Y | Y | 10 |
| Ogedegbe et al (2005)([81](#_ENREF_81)) | Y | Y | Y | Y | Y | U | Y | Y | Y | Y | 9 |
| Oscar et al (2009)([22](#_ENREF_22)) | Y | Y | Y | Y | Y | Y | Y | Y | Y | Y | 10 |
| Oster et al (2013)([99](#_ENREF_99)) | Y | Y | Y | Y | Y | Y | Y | Y | Y | Y | 10 |
| Oster et al (2014)([75](#_ENREF_75)) | Y | Y | Y | Y | Y | Y | Y | Y | Y | Y | 10 |
| Palmer et al (2010)([84](#_ENREF_84)) | Y | Y | Y | Y | Y | U | Y | U | Y | Y | 8 |
| Palmer et al (2014)([29](#_ENREF_29)) | Y | Y | Y | Y | Y | U | Y | Y | Y | Y | 9 |
| Palmer et al (2008)([76](#_ENREF_76)) | Y | Y | Y | Y | Y | Y | Y | Y | Y | Y | 10 |
| Ramos et al (2013)([39](#_ENREF_39)) | Y | Y | Y | U | Y | U | U | U | Y | Y | 6 |
| Reeder (2011)([85](#_ENREF_85)) | Y | Y | Y | Y | Y | U | U | Y | Y | Y | 8 |
| Ritvo, P. et al (2013)([73](#_ENREF_73)) | Y | Y | Y | Y | Y | N | Y | Y | Y | Y | 9 |
| Robb et al (2008)([103](#_ENREF_103)) | Y | Y | Y | Y | Y | N | U | N | Y | Y | 7 |
| Royak-Schaler et al (2004)([7](#_ENREF_7)) | Y | Y | Y | Y | Y | U | Y | U | Y | Y | 8 |
| Ruffin et al (2009)([23](#_ENREF_23)) | Y | Y | Y | Y | Y | U | Y | Y | Y | Y | 9 |
| Severino et al (2009)([57](#_ENREF_57)) | Y | Y | Y | Y | Y | Y | Y | Y | Y | Y | 10 |
| Shaw et al (2012)([104](#_ENREF_104)) | Y | Y | Y | Y | Y | U | U | U | Y | Y | 7 |
| Shokar et al (2005)([43](#_ENREF_43)) | Y | Y | Y | Y | Y | Y | U | Y | Y | Y | 9 |
| Sly et al (2013)([74](#_ENREF_74)) | Y | Y | Y | Y | Y | U | Y | Y | Y | Y | 9 |
| Tarasenko and Schoenberg (2011)([86](#_ENREF_86)) | Y | Y | Y | Y | Y | U | U | Y | Y | Y | 8 |
| Tarasenko et al (2011)([87](#_ENREF_87)) | Y | Y | Y | Y | Y | N | Y | U | Y | Y | 8 |
| Taylor et al (2000)([40](#_ENREF_40)) | Y | Y | Y | Y | Y | U | Y | Y | Y | Y | 9 |
| Thompson et al (2012)([90](#_ENREF_90)) | Y | Y | Y | Y | Y | N | N | U | Y | Y | 7 |
| Varela A. et al (2010)([36](#_ENREF_36)) | Y | Y | Y | Y | Y | U | Y | N | N | N | 6 |
| Von Wagner et al (2009)([60](#_ENREF_60)) | Y | Y | Y | Y | Y | N | Y | Y | Y | Y | 9 |
| Wackerbarth et al (2008)([51](#_ENREF_51)) | Y | Y | Y | Y | Y | U | Y | Y | Y | Y | 9 |
| Wackerbarth et al (2005)([44](#_ENREF_44)) | Y | Y | Y | Y | Y | Y | Y | U | Y | Y | 9 |
| Ward et al (2011)([64](#_ENREF_64)) | Y | Y | Y | Y | Y | U | Y | Y | Y | Y | 9 |
| Weitzman et al (2001)([2](#_ENREF_2)) | Y | Y | Y | Y | Y | U | Y | Y | Y | Y | 9 |
| Winterich et al (2009)([59](#_ENREF_59)) | Y | Y | N | Y | Y | Y | N | Y | Y | Y | 8 |
| Winterich et al (2011)([65](#_ENREF_65)) | Y | Y | Y | N | Y | U | Y | Y | Y | Y | 8 |
| Wong et al (2013)([91](#_ENREF_91)) | Y | U | Y | Y | Y | N | Y | Y | Y | Y | 8 |
| Woodrow et al (2008)([33](#_ENREF_33)) | Y | Y | Y | Y | Y | U | U | Y | Y | Y | 8 |
| Total average score | 94 | 92 | 87 | 82 | 90 | 33 | 63 | 67 | 89 | 88 | 8 |

Abbreviations:Y, Yes; N, No; U, Unclear.

Question 1: Was there a clear statement of the aims of the research?

Question 2: Is a qualitative methodology appropriate?

Question 3: Was the research design appropriate to address the aims of the research?

Question 4: Was the recruitment strategy appropriate to the aims of the research?

Question 5: Was the data collected in a way that addressed the research issue?

Question 6: Has the relationship between researcher and participants been adequately considered?

Question 7: Have ethical issues been taken into consideration?

Question 8: Was the data analysis sufficiently rigorous?

Question 9: Is there a clear statement of findings?

Question 10: How valuable is the research?

References

1. Beeker C, Kraft JM, Southwell BG, and Jorgensen CM. Colorectal cancer screening in older men and women: qualitative research findings and implications for intervention. J Community Health 2000;25:263-78.

2. Weitzman ER, Zapka J, Estabrook B, and Goins KV. Risk and reluctance: understanding impediments to colorectal cancer screening. Prev Med 2001;32:502-13.

3. Holmes-Rovner M, Williams GA, Hoppough S, Quillan L, Butler R, and Given CW. Colorectal cancer screening barriers in persons with low income. Cancer Pract 2002;10:240-7.

4. O'Malley AS, Renteria-Weitzman R, Huerta EE, and Mandelblatt J. Patient and provider priorities for cancer prevention and control: a qualitative study in Mid-Atlantic Latinos. Ethn Dis 2002;12:383-91.

5. Goel V, Gray R, Chart P, Fitch M, Saibil F, and Zdanowicz Y. Perspectives on colorectal cancer screening: a focus group study. Health Expect 2004;7:51-60.

6. O'Sullivan I and Orbell S. Self-sampling in screening to reduce mortality from colorectal cancer: a qualitative exploration of the decision to complete a faecal occult blood test (FOBT). J Med Screen 2004;11:16-22.

7. Royak-Schaler R, Blocker DE, Yali AM, Bynoe M, Briant KJ, and Smith S. Breast and colorectal cancer risk communication approaches with low-income African-American and Hispanic women: implications for healthcare providers. J Natl Med Assoc 2004;96:598-608.

8. Dube CE, Fuller BK, Rosen RK, Fagan M, and O'Donnell J. Men's experiences of physical exams and cancer screening tests: a qualitative study. Prev Med 2005;40:628-35.

9. Greiner KA, Born W, Nollen N, and Ahluwalia JS. Knowledge and perceptions of colorectal cancer screening among urban African Americans. J Gen Intern Med 2005;20:977-83.

10. Coronado GD, Farias A, Thompson B, Godina R, and Oderkirk W. Attitudes and beliefs about colorectal cancer among Mexican Americans in communities along the US-Mexico border. Ethn Dis 2006;16:421-7.

11. Morgan DL. Focus Groups as Qualitative Research. . 1988, Newbury Park, California: Sage Publications.

12. Goodman MJ, Ogdie A, Kanamori MJ, Canar J, and O'Malley AS. Barriers and facilitators of colorectal cancer screening among Mid-Atlantic Latinos: focus group findings. Ethn Dis 2006;16:255-61.

13. Greisinger A, Hawley ST, Bettencourt JL, Perz CA, and Vernon SW. Primary care patients' understanding of colorectal cancer screening. Cancer Detect Prev 2006;30:67-74.

14. Fernandez ME, Wippold R, Torres-Vigil I, Byrd T, Freeberg D, Bains Y, et al. Colorectal cancer screening among Latinos from U.S. cities along the Texas-Mexico border. Cancer Causes Control 2008;19:195-206.

15. Friedemann-Sanchez G, Griffin JM, and Partin MR. Gender differences in colorectal cancer screening barriers and information needs. Health Expect 2007;10:148-60.

16. Goldsmith G and Chiaro C. Colorectal cancer screening: how to help patients comply. J Fam Pract 2008;57:E2-7.

17. Baron-Epel O and Klin A. Cancer as perceived by a middle-aged Jewish urban population in Israel. Oncol Nurs Forum 2009;36:E326-34.

18. Feeley TH, Cooper J, Foels T, and Mahoney MC. Efficacy expectations for colorectal cancer screening in primary care: identifying barriers and facilitators for patients and clinicians. Health Commun 2009;24:304-15.

19. Francois F, Elysee G, Shah S, and Gany F. Colon cancer knowledge and attitudes in an immigrant Haitian community. J Immigr Minor Health 2009;11:319-25.

20. Holt CL, Shipp M, Eloubeidi M, Clay KS, Smith-Janas MA, Janas MJ, et al. Use of focus group data to develop recommendations for demographically segmented colorectal cancer educational strategies. Health Educ Res 2009;24:876-89.

21. Miles M and Huberman A. Qualitative data analysis: a sourcebook of new methods 1984, Newbury Park, CA: Sage Publication.

22. Oscar CS. Psychosocial Influences on the Colorectal Cancer Screening Beliefs and Practices of African-American Women: A Qualitative Study. 2009, The City University of New York: New York.

23. Ruffin MTt, Creswell JW, Jimbo M, and Fetters MD. Factors influencing choices for colorectal cancer screening among previously unscreened African and Caucasian Americans: findings from a triangulation mixed methods investigation. J Community Health 2009;34:79-89.

24. Bass SB, Gordon TF, Ruzek SB, Wolak C, Ward S, Paranjape A, et al. Perceptions of colorectal cancer screening in urban African American clinic patients: differences by gender and screening status. J Cancer Educ 2011;26:121-8.

25. Diaz JA, Goldman R, Arellano N, Borkan J, and Eaton CB. Brief report: exploration of colorectal cancer risk perceptions among Latinos. J Immigr Minor Health 2011;13:188-92.

26. Molina-Barcelo A, Salas Trejo D, Peiro-Perez R, and Malaga Lopez A. To participate or not? Giving voice to gender and socio-economic differences in colorectal cancer screening programmes. Eur J Cancer Care 2011;20:669-78.

27. Garcia-Dominic O, Lengerich EJ, Wray LA, Parrott R, Aumiller B, Kluhsman B, et al. Barriers to CRC screening among Latino adults in Pennsylvania: ACCN results. Am J Health Behav 2012;36:153-67.

28. Jilcott Pitts SB, Lea CS, May CL, Stowe C, Hamill DJ, Walker KT, et al. "Fault-line of an earthquake": a qualitative examination of barriers and facilitators to colorectal cancer screening in rural, Eastern North Carolina. J Rural Health 2013;29:78-87.

29. Palmer CK, Thomas MC, von Wagner C, and Raine R. Reasons for non-uptake and subsequent participation in the NHS Bowel Cancer Screening Programme: a qualitative study. Br J Cancer 2014;110:1705-11.

30. Ekberg M, Callender M, Hamer H, and Rogers S. Exploring the decision to participate in the National Health Service Bowel Cancer Screening Programme. Eur J Cancer Prev 2014;23:391-7.

31. Katz ML, James AS, Pignone MP, Hudson MA, Jackson E, Oates V, et al. Colorectal cancer screening among African American church members: a qualitative and quantitative study of patient-provider communication. BMC Public Health 2004;4:62.

32. Fyffe DC, Hudson SV, Fagan JK, and Brown DR. Knowledge and barriers related to prostate and colorectal cancer prevention in underserved black men. J Natl Med Assoc 2008;100:1161-7.

33. Woodrow C, Watson E, Rozmovits L, Parker R, and Austoker J. Public perceptions of communicating information about bowel cancer screening. Health Expect 2008;11:16-25.

34. Austin KL, Power E, Solarin I, Atkin WS, Wardle J, and Robb KA. Perceived barriers to flexible sigmoidoscopy screening for colorectal cancer among UK ethnic minority groups: a qualitative study. J Med Screen 2009;16:174-9.

35. Jones RM, Devers KJ, Kuzel AJ, and Woolf SH. Patient-reported barriers to colorectal cancer screening: a mixed-methods analysis. Am J Prev Med 2010;38:508-16.

36. Varela A, Jandorf L, and Duhamel K. Understanding factors related to Colorectal Cancer (CRC) screening among urban Hispanics: use of focus group methodology. J Cancer Educ 2010;25:70-5.

37. Hatcher J, Dignan MB, and Schoenberg N. How do rural health care providers and patients view barriers to colorectal cancer screening? Insights from appalachian kentucky. Nurs Clin North Am 2011;46:181-92.

38. James AS, Filippi MK, Pacheco CM, Cully L, Perdue D, Choi WS, et al. Barriers to colorectal cancer screening among American Indian men aged 50 or older, Kansas and Missouri, 2006-2008. Prev Chronic Dis 2013;10:130067.

39. Ramos M, Taltavull M, Pineiro P, Nieto R, and Llagostera M. [Attitudes of primary health care users to a colorectal cancer screening program]. Gac Sanit 2013;27:516-20.

40. Taylor T, Williamson S, Wardle J, Borrill J, Sutton S, and Atkin W. Acceptability of flexible sigmoidoscopy screening in older adults in the United Kingdom. J Med Screen 2000;7:38-45.

41. Denberg TD, Melhado TV, Coombes JM, Beaty BL, Berman K, Byers TE, et al. Predictors of nonadherence to screening colonoscopy. J Gen Intern Med 2005;20:989-95.

42. Frew EJ, Wolstenholme JL, and Whynes DK. Eliciting relative preferences for two methods of colorectal cancer screening. Eur J Cancer Care 2005;14:124-31.

43. Shokar NK, Vernon SW, and Weller SC. Cancer and colorectal cancer: knowledge, beliefs, and screening preferences of a diverse patient population. Fam Med 2005;37:341-7.

44. Wackerbarth SB, Peters JC, and Haist SA. "Do we really need all that equipment?": factors influencing colorectal cancer screening decisions. Qual Health Res 2005;15:539-54.

45. Choe JH, Tu SP, Lim JM, Burke NJ, Acorda E, and Taylor VM. "Heat in their intestine": colorectal cancer prevention beliefs among older Chinese Americans. Ethn Dis 2006;16:248-54.

46. Bastani R, Maxwell AE, Bradford C, Das IP, and Yan KX. Tailored risk notification for women with a family history of breast cancer. Prev Med 1999;29:355-64.

47. Chapple A, Ziebland S, Hewitson P, and McPherson A. What affects the uptake of screening for bowel cancer using a faecal occult blood test (FOBt): a qualitative study. Soc Sci Med 2008;66:2425-35.

48. Green AR, Peters-Lewis A, Percac-Lima S, Betancourt JR, Richter JM, Janairo MP, et al. Barriers to screening colonoscopy for low-income Latino and white patients in an urban community health center. J Gen Intern Med 2008;23:834-40.

49. Hoffman-Goetz L, Thomson MD, and Donelle L. Reasons for declining colorectal cancer screening by older Canadians: a pilot study. J Cancer Educ 2008;23:32-6.

50. Lasser KE, Ayanian JZ, Fletcher RH, and Good MJ. Barriers to colorectal cancer screening in community health centers: a qualitative study. BMC Fam Pract 2008;9:15.

51. Wackerbarth SB, Peters JC, and Haist SA. Modeling the decision to undergo colorectal cancer screening: insights on patient preventive decision making. Med Care 2008;46:S17-22.

52. Lewin K. Principles of topological psychology 1936, New York, NY: McGraw-Hill.

53. Ge G, Burke N, Somkin CP, and Pasick R. Considering culture in physician-- patient communication during colorectal cancer screening. Qual Health Res 2009;19:778-89.

54. Goldman RE, Diaz JA, and Kim I. Perspectives of colorectal cancer risk and screening among Dominicans and Puerto Ricans: stigma and misperceptions. Qual Health Res 2009;19:1559-68.

55. Bourdieu P. A social critique of the judgment of taste 1985, Cambridge, MA: Harvard University Press.

56. Thompson J. Idealogy and modern culture: Critical social theory in the era of mass communication 1990, Stanford, CA: Stanford University Press.

57. Severino G, Wilson C, Turnbull D, Duncan A, and Gregory T. Attitudes towards and beliefs about colorectal cancer and screening using the faecal occult blood test within the Italian-Australian community. Asian Pac J Cancer Prev 2009;10:387-94.

58. Kleinman A, Eisenberg L, and Good B. Culture, illness, and care: clinical lessons from anthropologic and cross-cultural research. Ann Intern Med 1978;88:251-8.

59. Winterich JA, Quandt SA, Grzywacz JG, Clark PE, Miller DP, Acuna J, et al. Masculinity and the body: how African American and White men experience cancer screening exams involving the rectum. Am J Mens Health 2009;3:300-9.

60. Von Wagner C, Knight K, Halligan S, Atkin W, Lilford R, Morton D, et al. Patient experiences of colonoscopy, barium enema and CT colonography: a qualitative study. Br J Radiol 2009;82:13-9.

61. Aubin-Auger I, Mercier A, Lebeau JP, Baumann L, Peremans L, and Van Royen P. Obstacles to colorectal screening in general practice: a qualitative study of GPs and patients. Fam Pract 2011;28:670-6.

62. Bong G and McCool J. Chinese peoples' perceptions of colorectal cancer screening: a New Zealand perspective. N Z Med J 2011;124:29-38.

63. Gwede CK, Jean-Francois E, Quinn GP, Wilson S, Tarver WL, Thomas KB, et al. Perceptions of colorectal cancer among three ethnic subgroups of US blacks: a qualitative study. J Natl Med Assoc 2011;103:669-80.

64. Ward PR, Javanparast S, and Wilson C. Equity of colorectal cancer screening: which groups have inequitable participation and what can we do about it? Aust J Prim Health 2011;17:334-46.

65. Winterich JA, Quandt SA, Grzywacz JG, Clark P, Dignan M, Stewart JH, et al. Men's knowledge and beliefs about colorectal cancer and 3 screenings: education, race, and screening status. Am J Health Behav 2011;35:525-34.

66. Bapuji SB, Lobchuk MM, McClement SE, Sisler JJ, Katz A, and Martens P. Fecal occult blood testing instructions and impact on patient adherence. Cancer Epidemiol 2012;36:e258-64.

67. Getrich CM, Sussman AL, Helitzer DL, Hoffman RM, Warner TD, Sanchez V, et al. Expressions of machismo in colorectal cancer screening among New Mexico Hispanic subpopulations. Qual Health Res 2012;22:546-59.

68. Greiner KA, Geana MV, Epp A, Watson A, Filippi M, Daley CM, et al. A computerized intervention to promote colorectal cancer screening for underserved populations: theoretical background and algorithm development. Technol Health Care 2012;20:25-35.

69. Ajzen I. Theories of Cognitive Self-RegulationThe theory of planned behavior. Organizational Behavior and Human Decision Processes 1991;50:179-211.

70. Lobchuk MM, Bapuji SB, McClement SE, Sisler JJ, Katz A, Martens P, et al. What is the role of family in promoting faecal occult blood test screening? Exploring physician, average-risk individual, and family perceptions. Cancer Epidemiol 2012;36:e190-9.

71. Manne S, Etz RS, Hudson SV, Medina-Forrester A, Boscarino JA, Bowen DJ, et al. A qualitative analysis of couples' communication regarding colorectal cancer screening using the Interdependence Model. Patient Educ Couns 2012;87:18-22.

72. Lee SY and Lee EE. Korean Americans' beliefs about colorectal cancer screening. Asian Nurs Res (Korean Soc Nurs Sci) 2013;7:45-52.

73. Ritvo P, Myers RE, Paszat L, Serenity M, Perez DF, and Rabeneck L. Gender differences in attitudes impeding colorectal cancer screening. BMC Public Health 2013;13:500.

74. Sly JR, Edwards T, Shelton RC, and Jandorf L. Identifying barriers to colonoscopy screening for nonadherent African American participants in a patient navigation intervention. Health Educ Behav 2013;40:449-57.

75. Oster C, McGuiness C, Duncan A, and Turnbull D. Masculinity and Men's Participation in Colorectal Cancer Screening. Psychology of Men & Masculinity. Nov 2014 2014.

76. Palmer RC, Midgette LA, and Dankwa I. Colorectal cancer screening and African Americans: findings from a qualitative study. Cancer Control 2008;15:72-9.

77. Holt WS, Jr. Factors affecting compliance with screening sigmoidoscopy. J Fam Pract 1991;32:585-9.

78. McCaffery K, Borril J, Williamson S, Taylor T, Sutton S, Atkin W, et al. Declining the offer of flexible sigmoidoscopy screening for bowel cancer: a qualitative investigation of the decision-making process. Soc Sci Med 2001;53:679-91.

79. O'Malley AS, Beaton E, Yabroff KR, Abramson R, and Mandelblatt J. Patient and provider barriers to colorectal cancer screening in the primary care safety-net. Prev Med 2004;39:56-63.

80. Hou SI. Factors associated with intentions for colorectal cancer screenings in a Chinese sample. Psychol Rep 2005;96:159-62.

81. Ogedegbe G, Cassells AN, Robinson CM, DuHamel K, Tobin JN, Sox CH, et al. Perceptions of barriers and facilitators of cancer early detection among low-income minority women in community health centers. J Natl Med Assoc 2005;97:162-70.

82. Lasser KE, Kelly B, Maier J, Murillo J, Hoover S, Isenberg K, et al. Discussions about preventive services: a qualitative study. BMC Fam Pract 2008;9:49.

83. McQueen A, Bartholomew LK, Greisinger AJ, Medina GG, Hawley ST, Haidet P, et al. Behind closed doors: physician-patient discussions about colorectal cancer screening. J Gen Intern Med 2009;24:1228-35.

84. Palmer RC, Midgette LA, and Mullan ID. Colorectal cancer screening preferences among African Americans: which screening test is preferred? J Cancer Educ 2010;25:577-81.

85. Reeder AI. "It's a small price to pay for life": faecal occult blood test (FOBT) screening for colorectal cancer, perceived barriers and facilitators. N Z Med J 2011;124:11-7.

86. Tarasenko YN and Schoenberg NE. Colorectal cancer screening among rural Appalachian residents with multiple morbidities. Rural Remote Health 2011;11:1553.

87. Tarasenko YN, Wackerbarth SB, Love MM, Joyce JM, and Haist SA. Colorectal cancer screening: patients' and physicians' perspectives on decision-making factors. J Cancer Educ 2011;26:285-93.

88. Foo AS, Thia JJ, Ng ZP, Fong NP, and Koh GC. Colorectal cancer screening: the effectiveness of education on its barriers and acceptability. Asia Pac J Public Health 2012;24:595-609.

89. Javanparast S, Ward PR, Carter SM, and Wilson CJ. Barriers to and facilitators of colorectal cancer screening in different population subgroups in Adelaide, South Australia. Med J Aust 2012;196:521-3.

90. Thompson L, Reeder T, and Abel G. I can't get my husband to go and have a colonoscopy: gender and screening for colorectal cancer. Health (London) 2012;16:235-49.

91. Wong CR, Bloomfield ER, Crookes DM, and Jandorf L. Barriers and facilitators to adherence to screening colonoscopy among African-Americans: a mixed-methods analysis. J Cancer Educ 2013;28:722-8.

92. Brouse CH, Basch CE, Wolf RL, Shmukler C, Neugut AI, and Shea S. Barriers to colorectal cancer screening with fecal occult blood testing in a predominantly minority urban population: a qualitative study. Am J Public Health 2003;93:1268-71.

93. Good K, Niziolek J, Yoshida C, and Rowlands A. Insights into barriers that prevent African Americans from seeking colorectal screenings: a qualitative study. Gastroenterol Nurs 2010;33:204-8.

94. Clavarino AM, Janda M, Hughes KL, Del Mar C, Tong S, Stanton WR, et al. The view from two sides: a qualitative study of community and medical perspectives on screening for colorectal cancer using FOBT. Prev Med 2004;39:482-90.

95. Beyer KM, Comstock S, Seagren R, and Rushton G. Explaining place-based colorectal cancer health disparities: evidence from a rural context. Soc Sci Med 2011;72:373-82.

96. Salant T and Gehlert S. Collective memory, candidacy, and victimisation: community epidemiologies of breast cancer risk. Sociol Health Illn 2008;30:599-615.

97. Behringer B and Friedell GH. Appalachia: where place matters in health. Prev Chronic Dis 2006;3:A113.

98. James AS, Daley CM, and Greiner KA. Knowledge and attitudes about colon cancer screening among African Americans. Am J Health Behav 2011;35:393-401.

99. Oster C, Zajac I, Flight I, Hart E, Young GP, Wilson C, et al. Ambivalence and its influence on participation in screening for colorectal cancer. Qual Health Res 2013;23:1188-201.

100. Garcia M, Borras JM, Mila N, Espinas JA, Binefa G, Fernandez E, et al. Factors associated with initial participation in a population-based screening for colorectal cancer in Catalonia, Spain: a mixed-methods study. Prev Med 2011;52:265-7.

101. Brouse CH, Basch CE, Wolf RL, and Shmukler C. Barriers to colorectal cancer screening: an educational diagnosis. J Cancer Educ 2004;19:170-3.

102. Hou SI. Experience of colorectal cancer screening using a home-administered kit for fecal occult blood tests among a Chinese worksite population in Taiwan. Psychol Rep 2005;96:178-80.

103. Robb KA, Solarin I, Power E, Atkin W, and Wardle J. Attitudes to colorectal cancer screening among ethnic minority groups in the UK. BMC Public Health 2008;8:34.

104. Shaw SJ, Vivian J, Orzech KM, Torres CH, and Armin J. Consistency in attitudes across cancer screenings in medically underserved minority populations. J Cancer Educ 2012;27:165-71.
